# Supplementary material for: Evaluation of Possible Antioxidant, Anti-Hyperglycaemic, Anti-Alzheimer and Anti-Inflammatory Effects of Teucrium polium Aerial Parts (Lamiaceae)
Source: MDPI journal article supplement (doi:10.3390/life12101579), 2022-10-11
Supplement: s1 [file s1]

# Evaluation of possible antioxidant, anti-hyperglycaemic, anti-Alzheimer and anti-inflammatory effects of *Teucrium polium* aerial parts (Lamiaceae)

## Supplementary data

**Figure S1:** Validation of the docking experiments for human  $\alpha$ -amylase, (A), 5-lipoxygenase (B) and acetylcholine esterase, (C).

**Figure S2:** 2D binding mode of compounds identified from Algerian *Teucrium polium* aerial parts inside the active site of human  $\alpha$ -amylase

**Figure S3:** 2D binding mode of compounds identified from Algerian *Teucrium polium* aerial parts inside the active site of 5-lipoxygenase

**Figure S4:** 2D binding mode of compounds identified from Algerian *Teucrium polium* aerial parts inside the active site of acetylcholine esterase

**Figure S1:** Validation of the docking experiments for human  $\alpha$ -amylase, (A), 5-lipoxygenase (B) and acetylcholine esterase, (C).

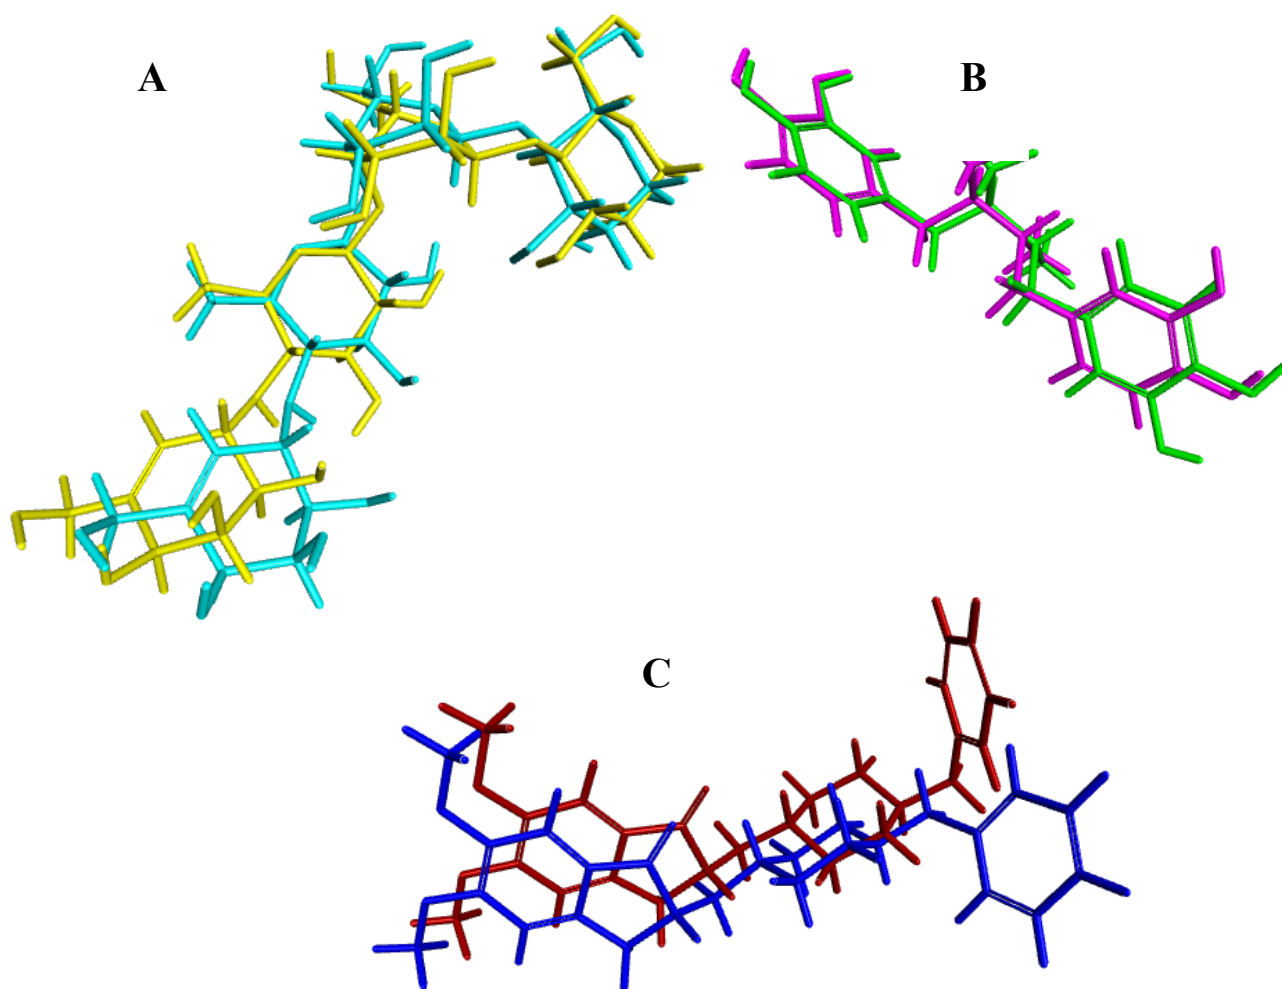

**Figure S2:** 2D binding mode of compounds identified from Algerian *Teucrium polium* aerial parts inside the active site of human  $\alpha$ -amylase

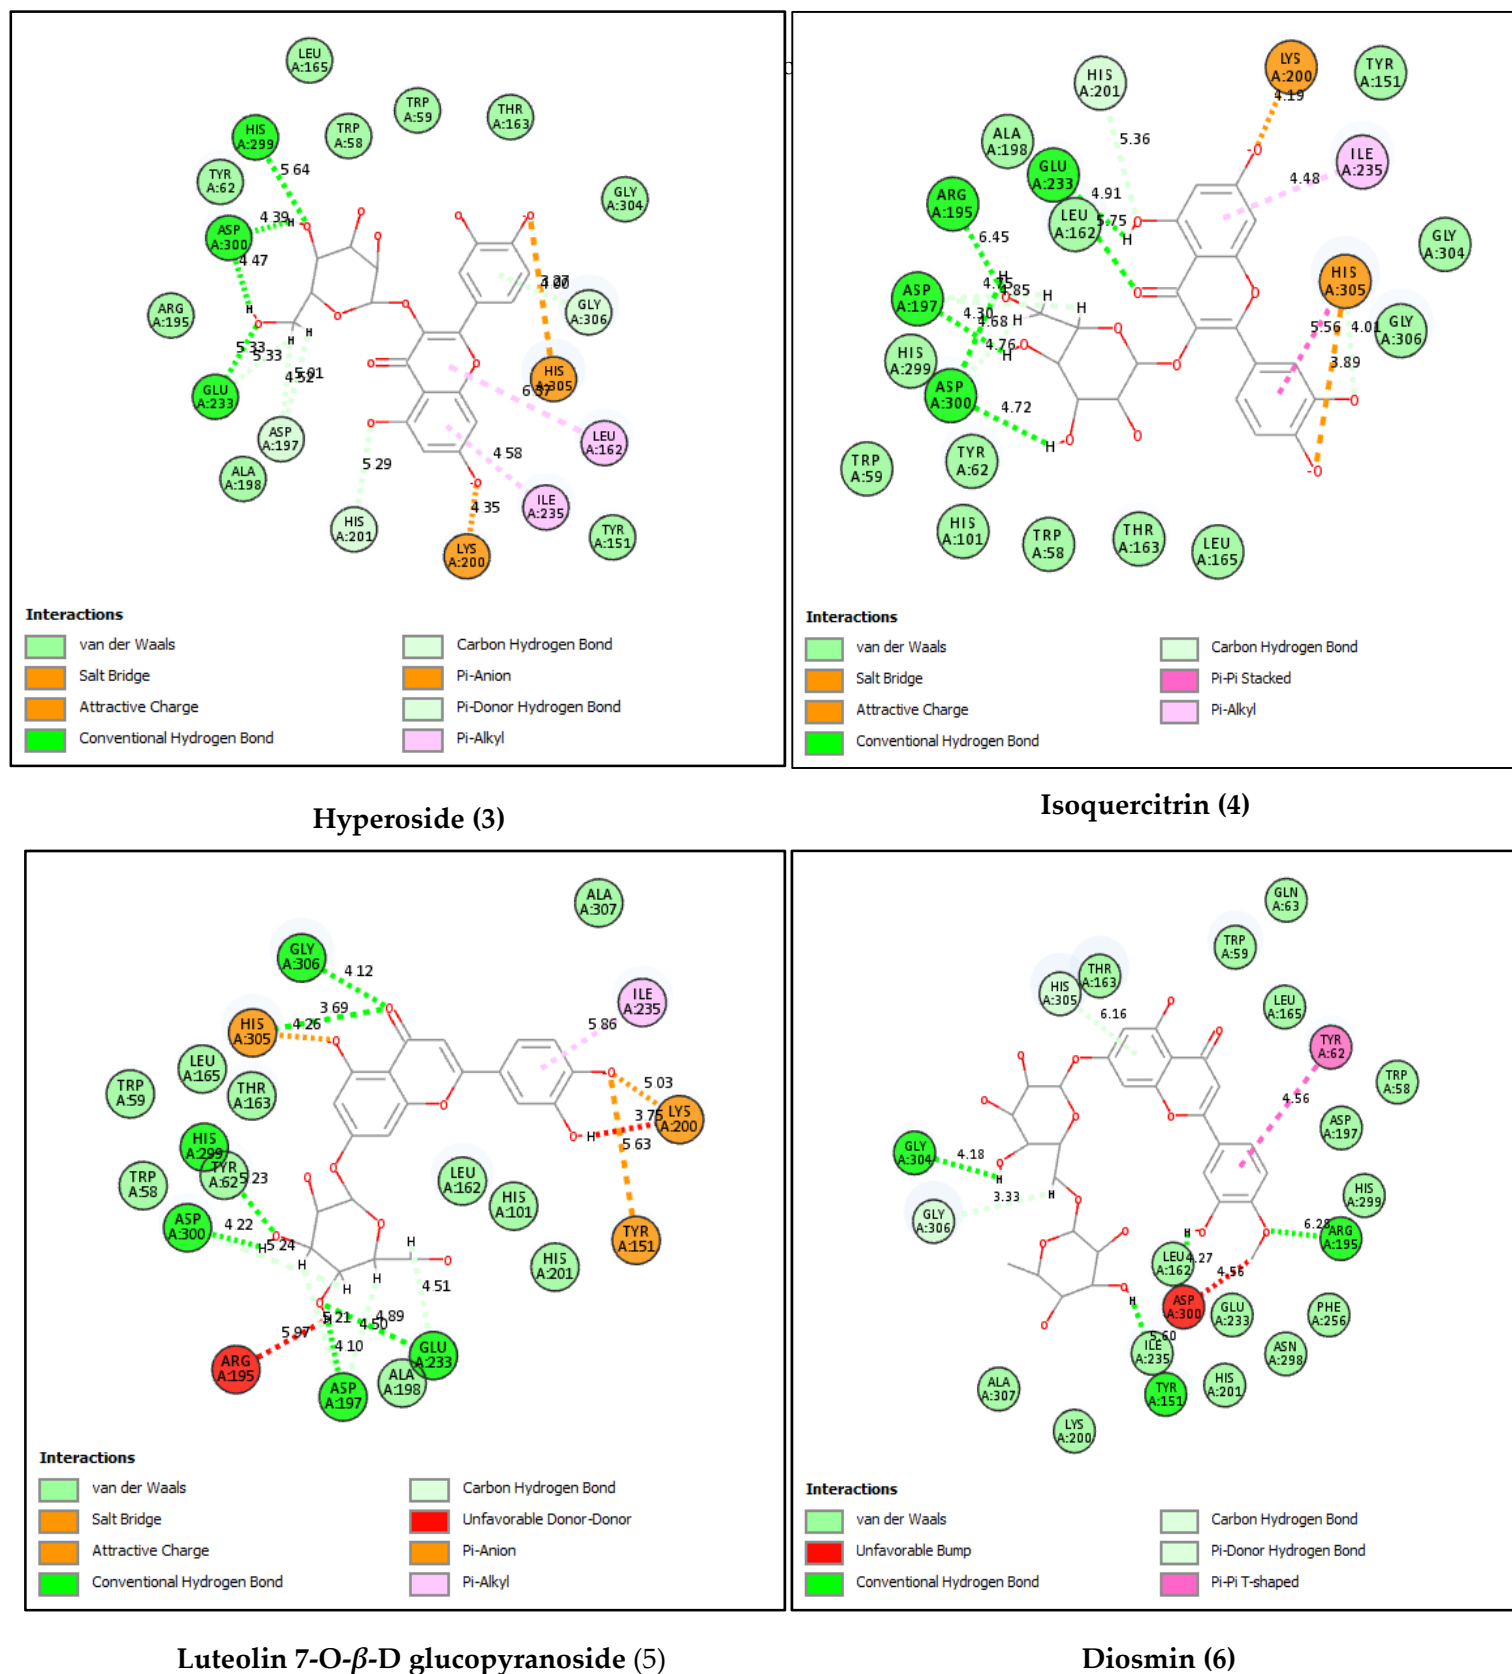

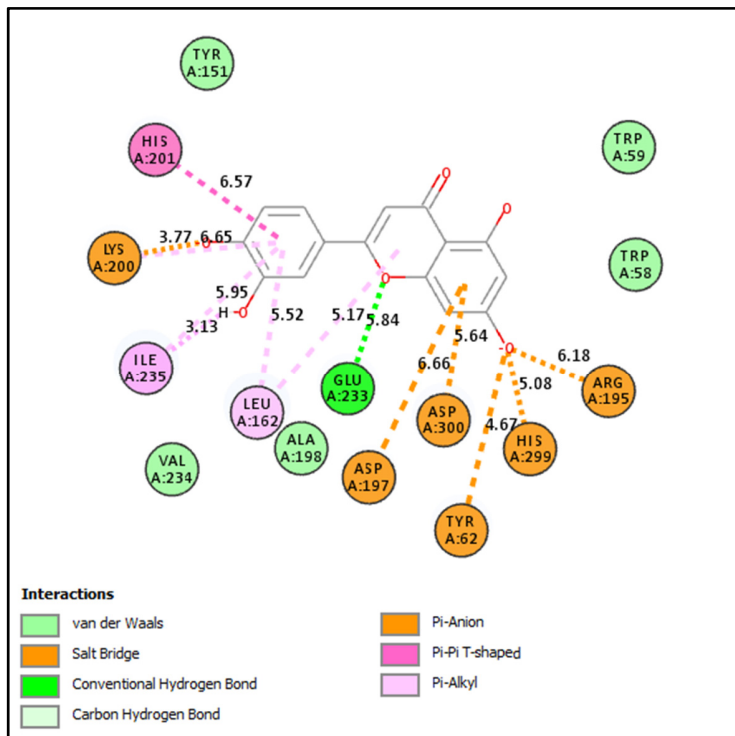

Luteolin (7)

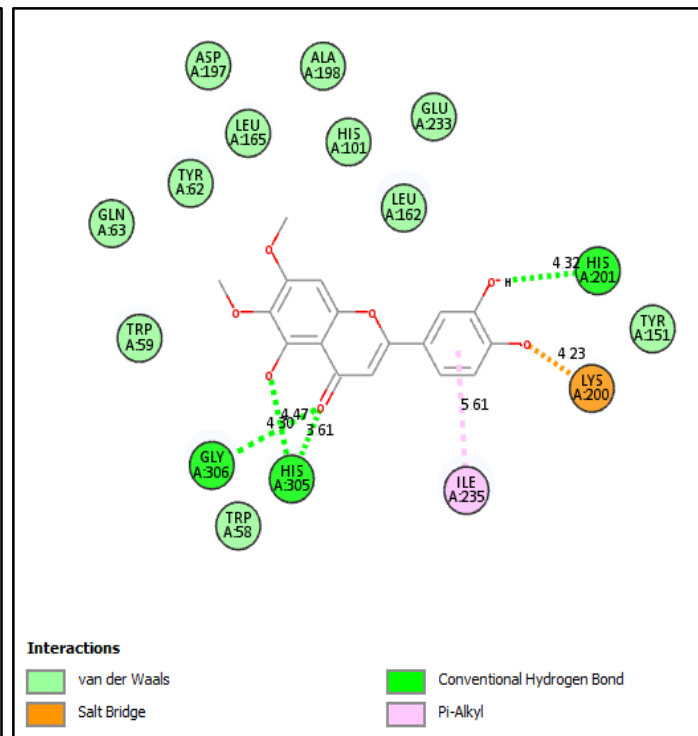

Cirsiliol (8)

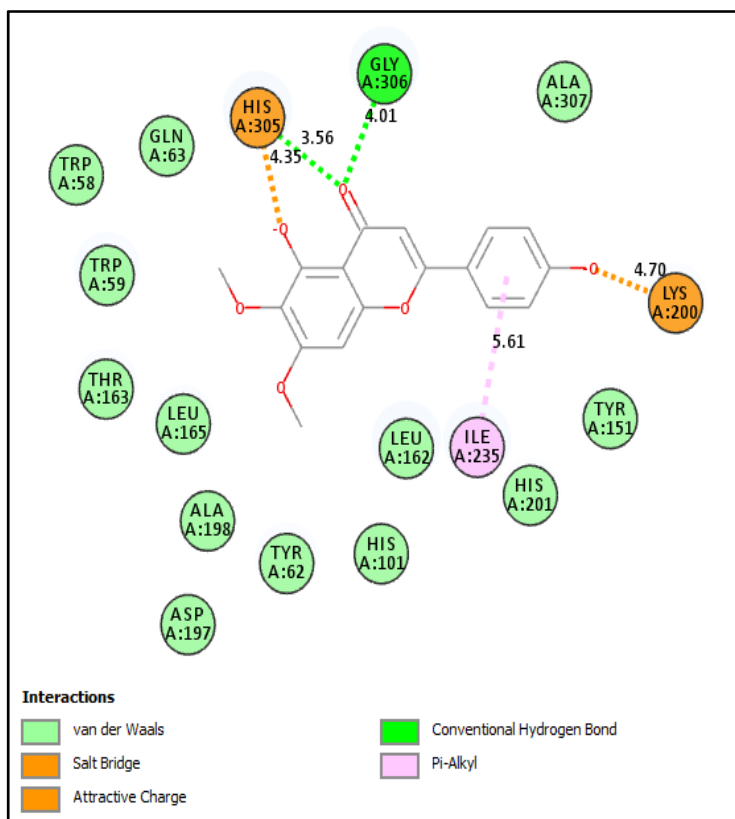

Cirsimaritin (9)

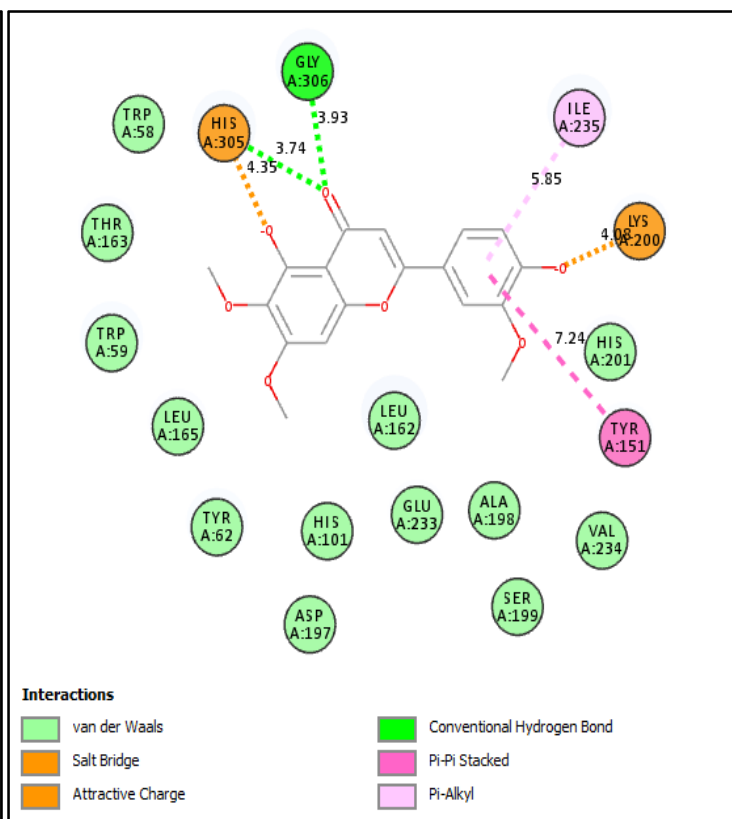

Cirsilineol (10)

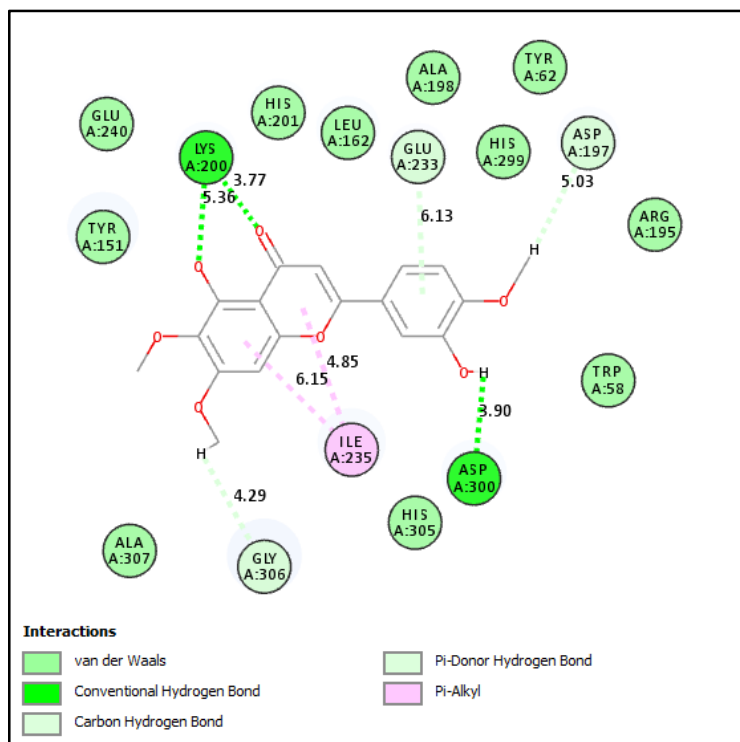

Eupatorin (11)

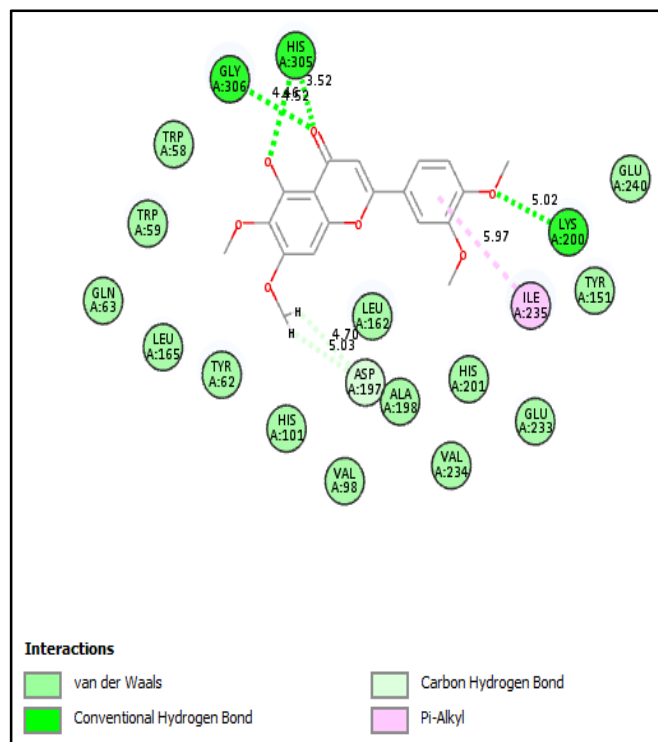

5-Desmethylinensetin (12)

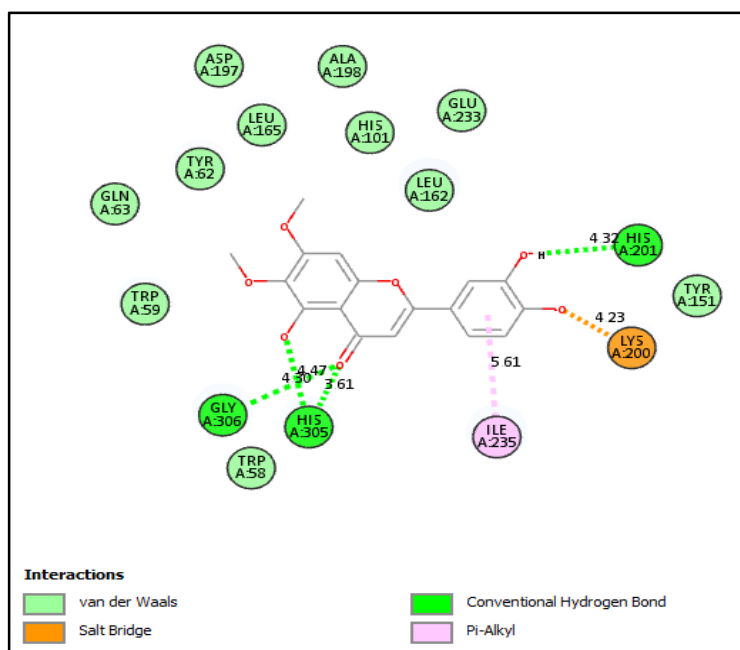

Salvigenin (13)

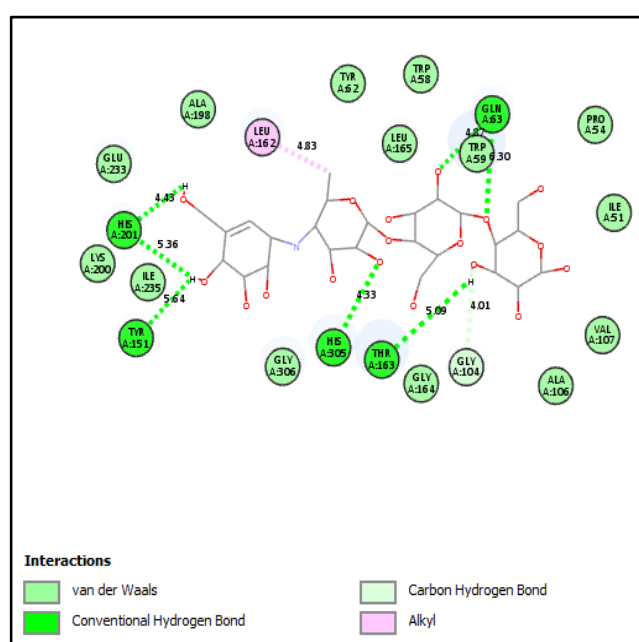

Acarbose

**Figure S3:** 2D binding mode of compounds identified from Algerian *Teucrium polium* aerial parts inside the active site of 5-lipoxygenase

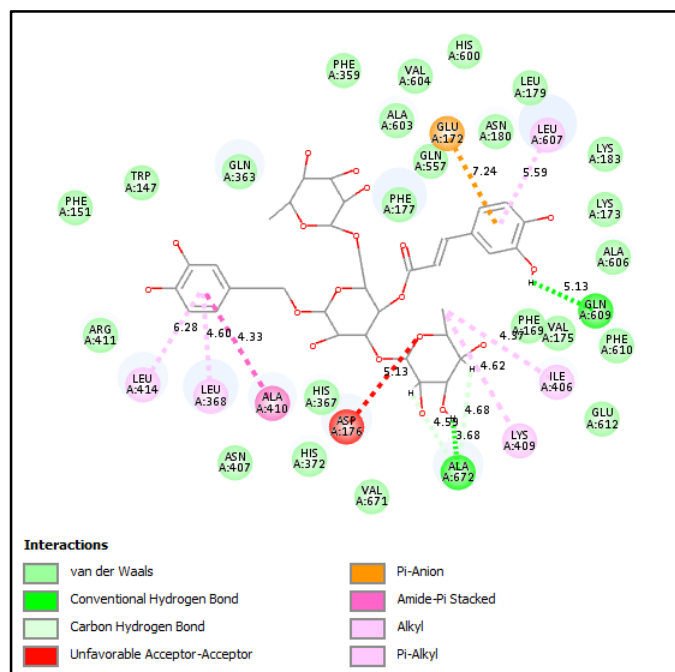

**Poliumoside (1)**

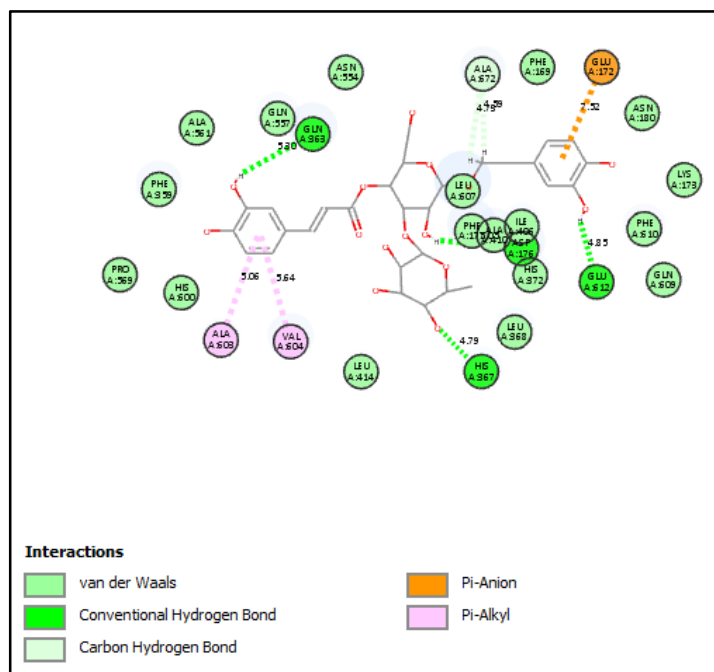

**Acteoside (2)**

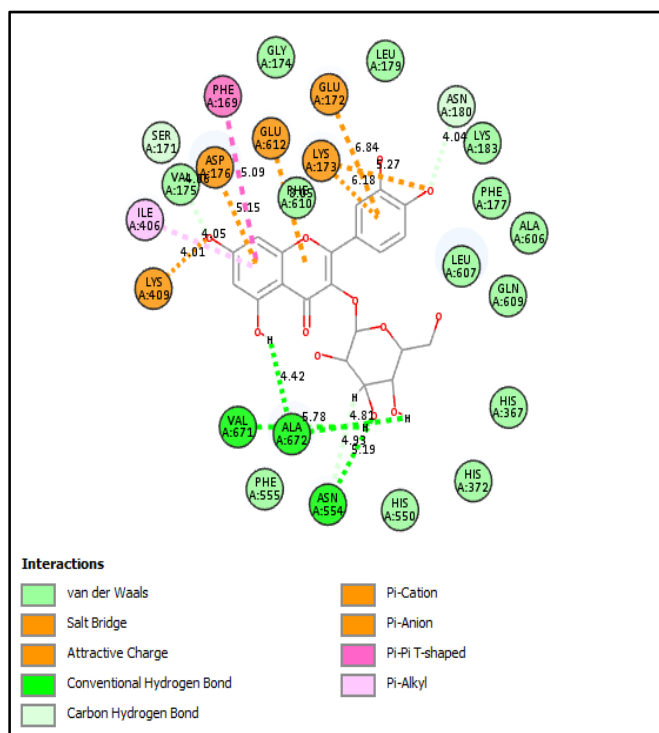

**Hyperoside (3)**

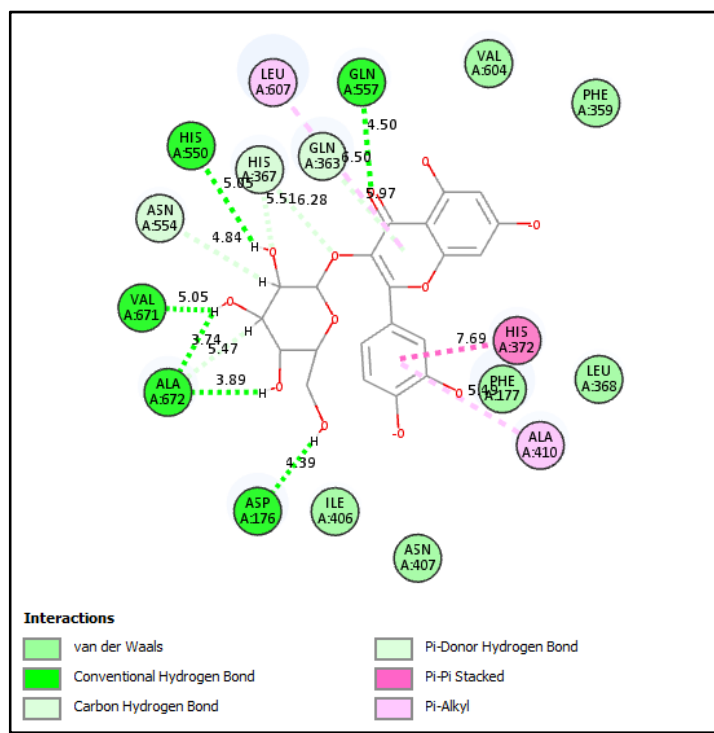

**Isoquercitrin (4)**

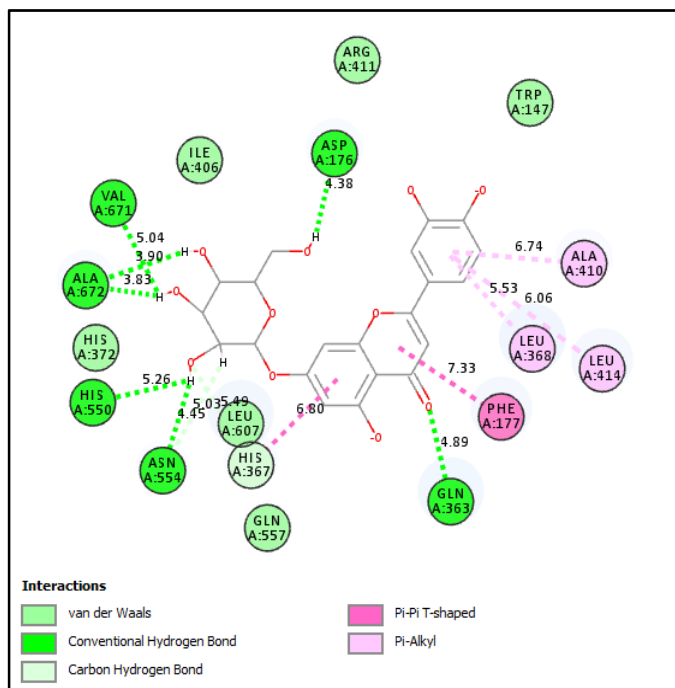

Luteolin 7-O- $\beta$ -D glucopyranoside (5)

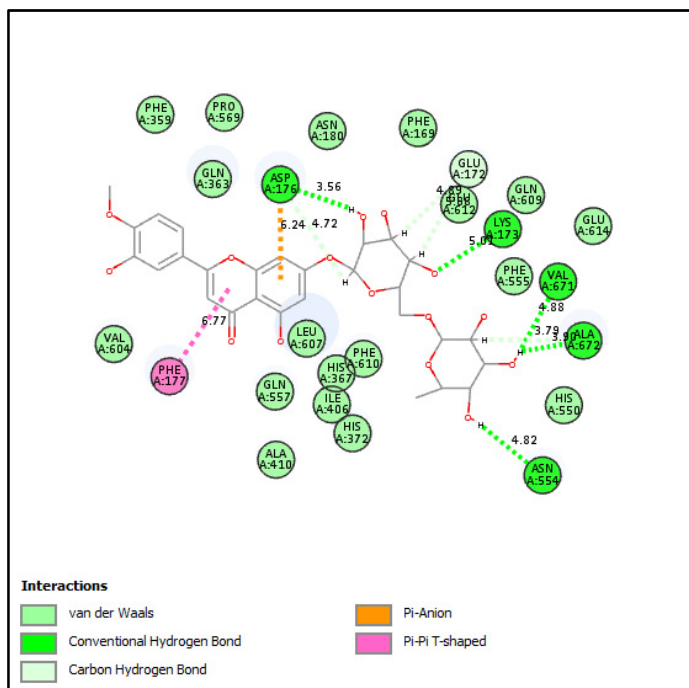

Diosmin (6)

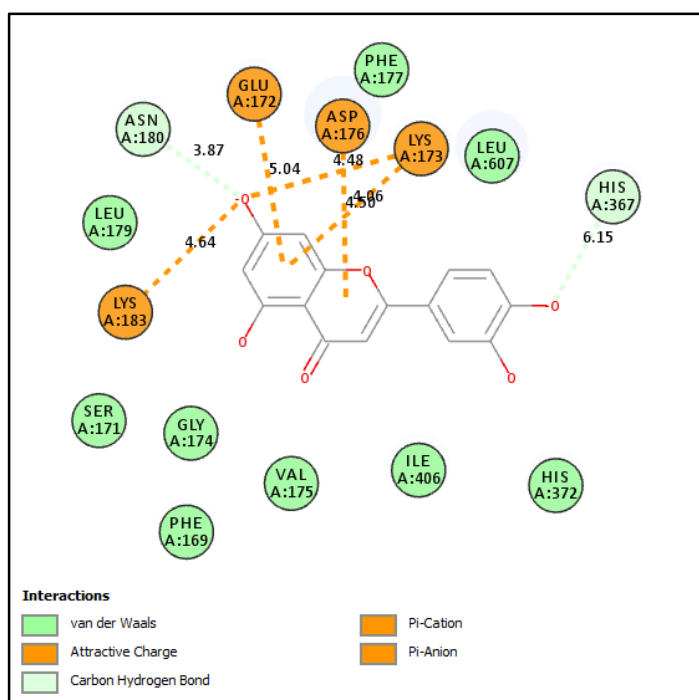

Luteolin (7)

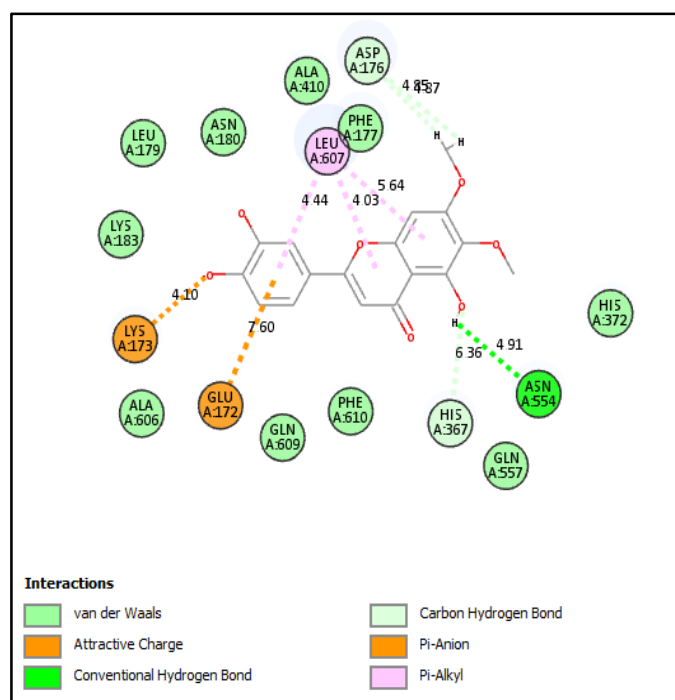

Cirsiolol (8)

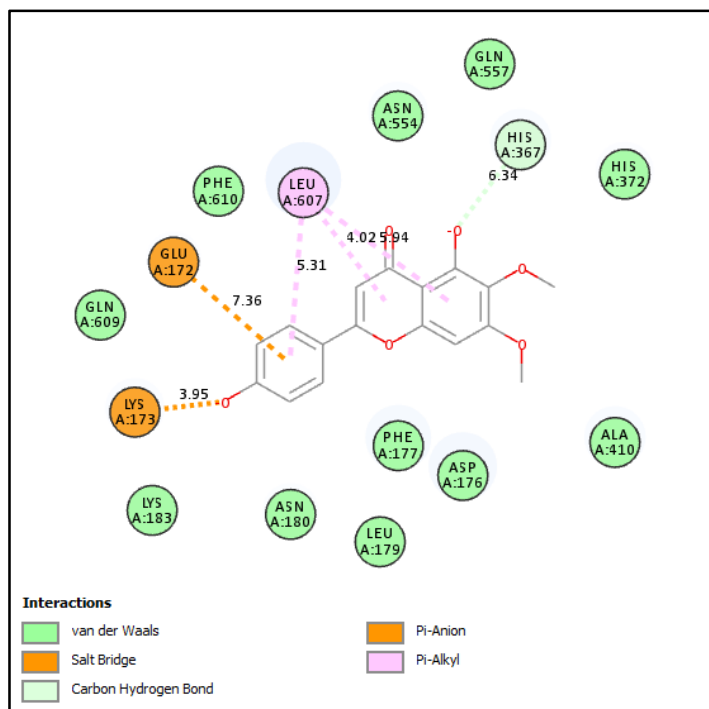

Cirsimaritin (9)

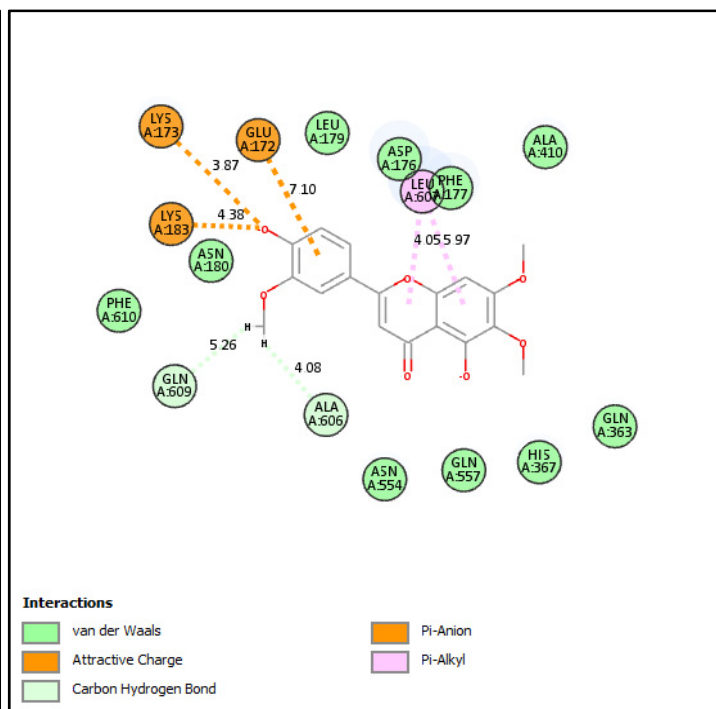

Cirsilineol (10)

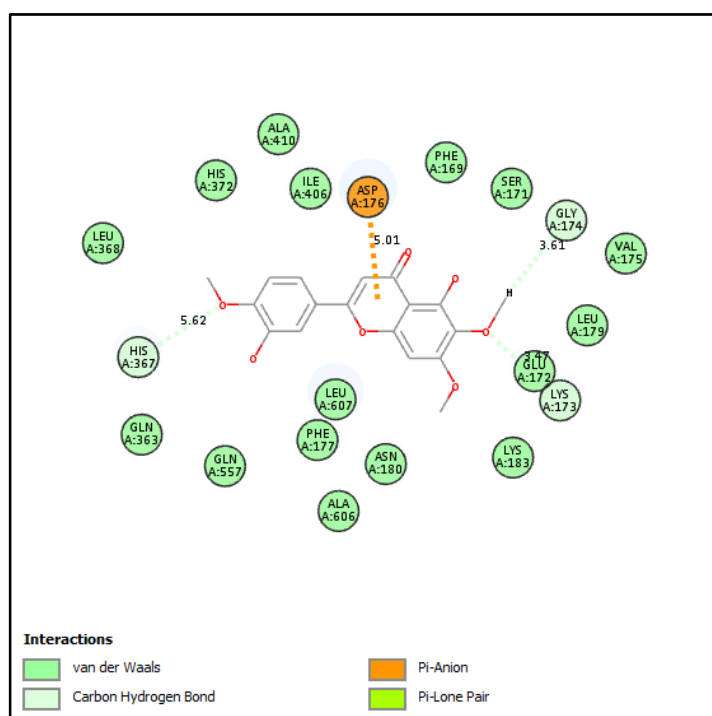

Eupatorin (11)

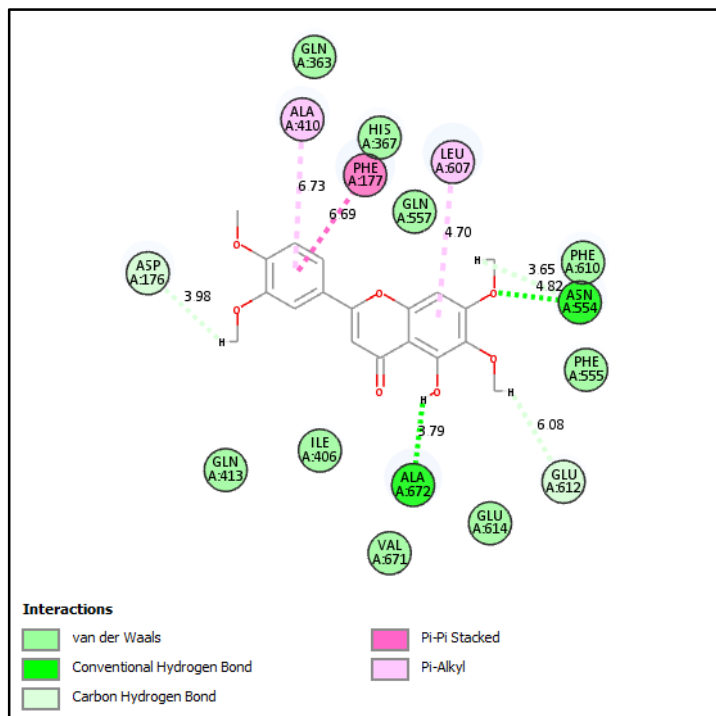

5-Desmethylinensetin (12)



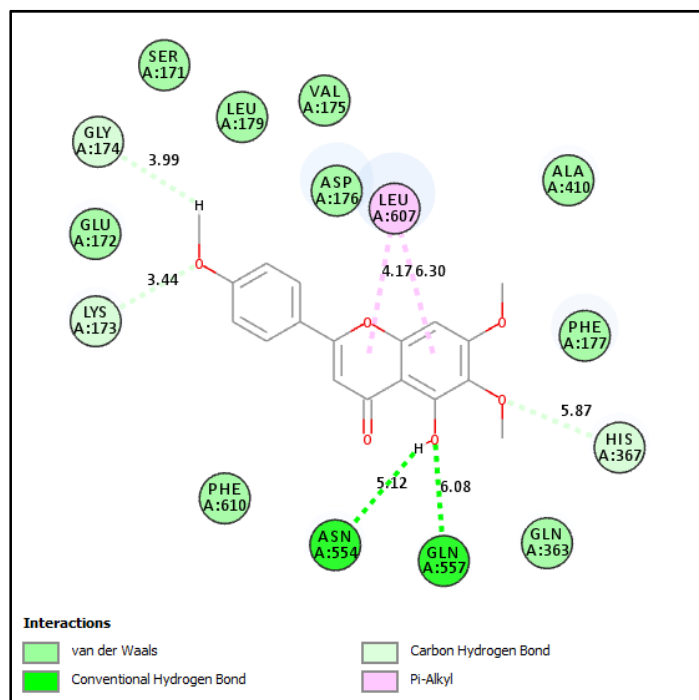

Salvigenin (13)

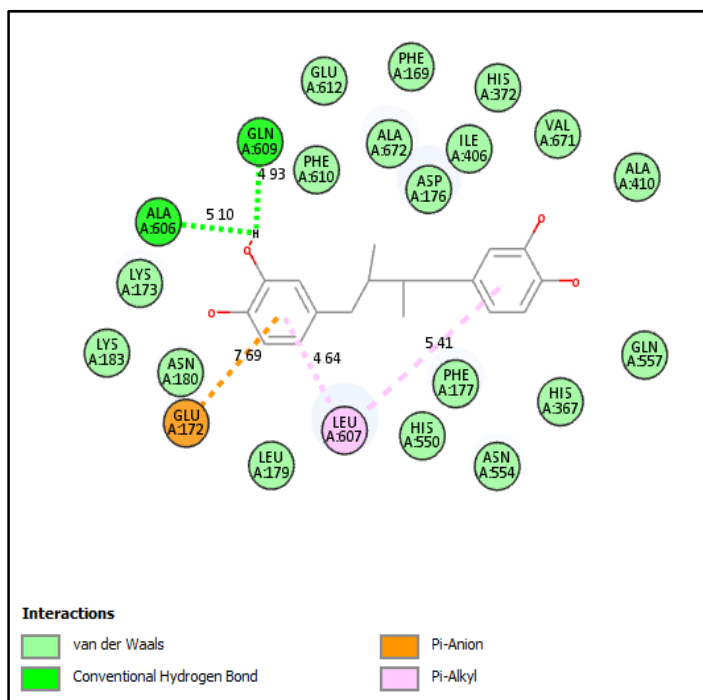

Nordihydroguaiaretic acid

**Figure S4:** 2D binding mode of compounds identified from Algerian *Teucrium polium* aerial parts inside the active site of acetylcholine esterase

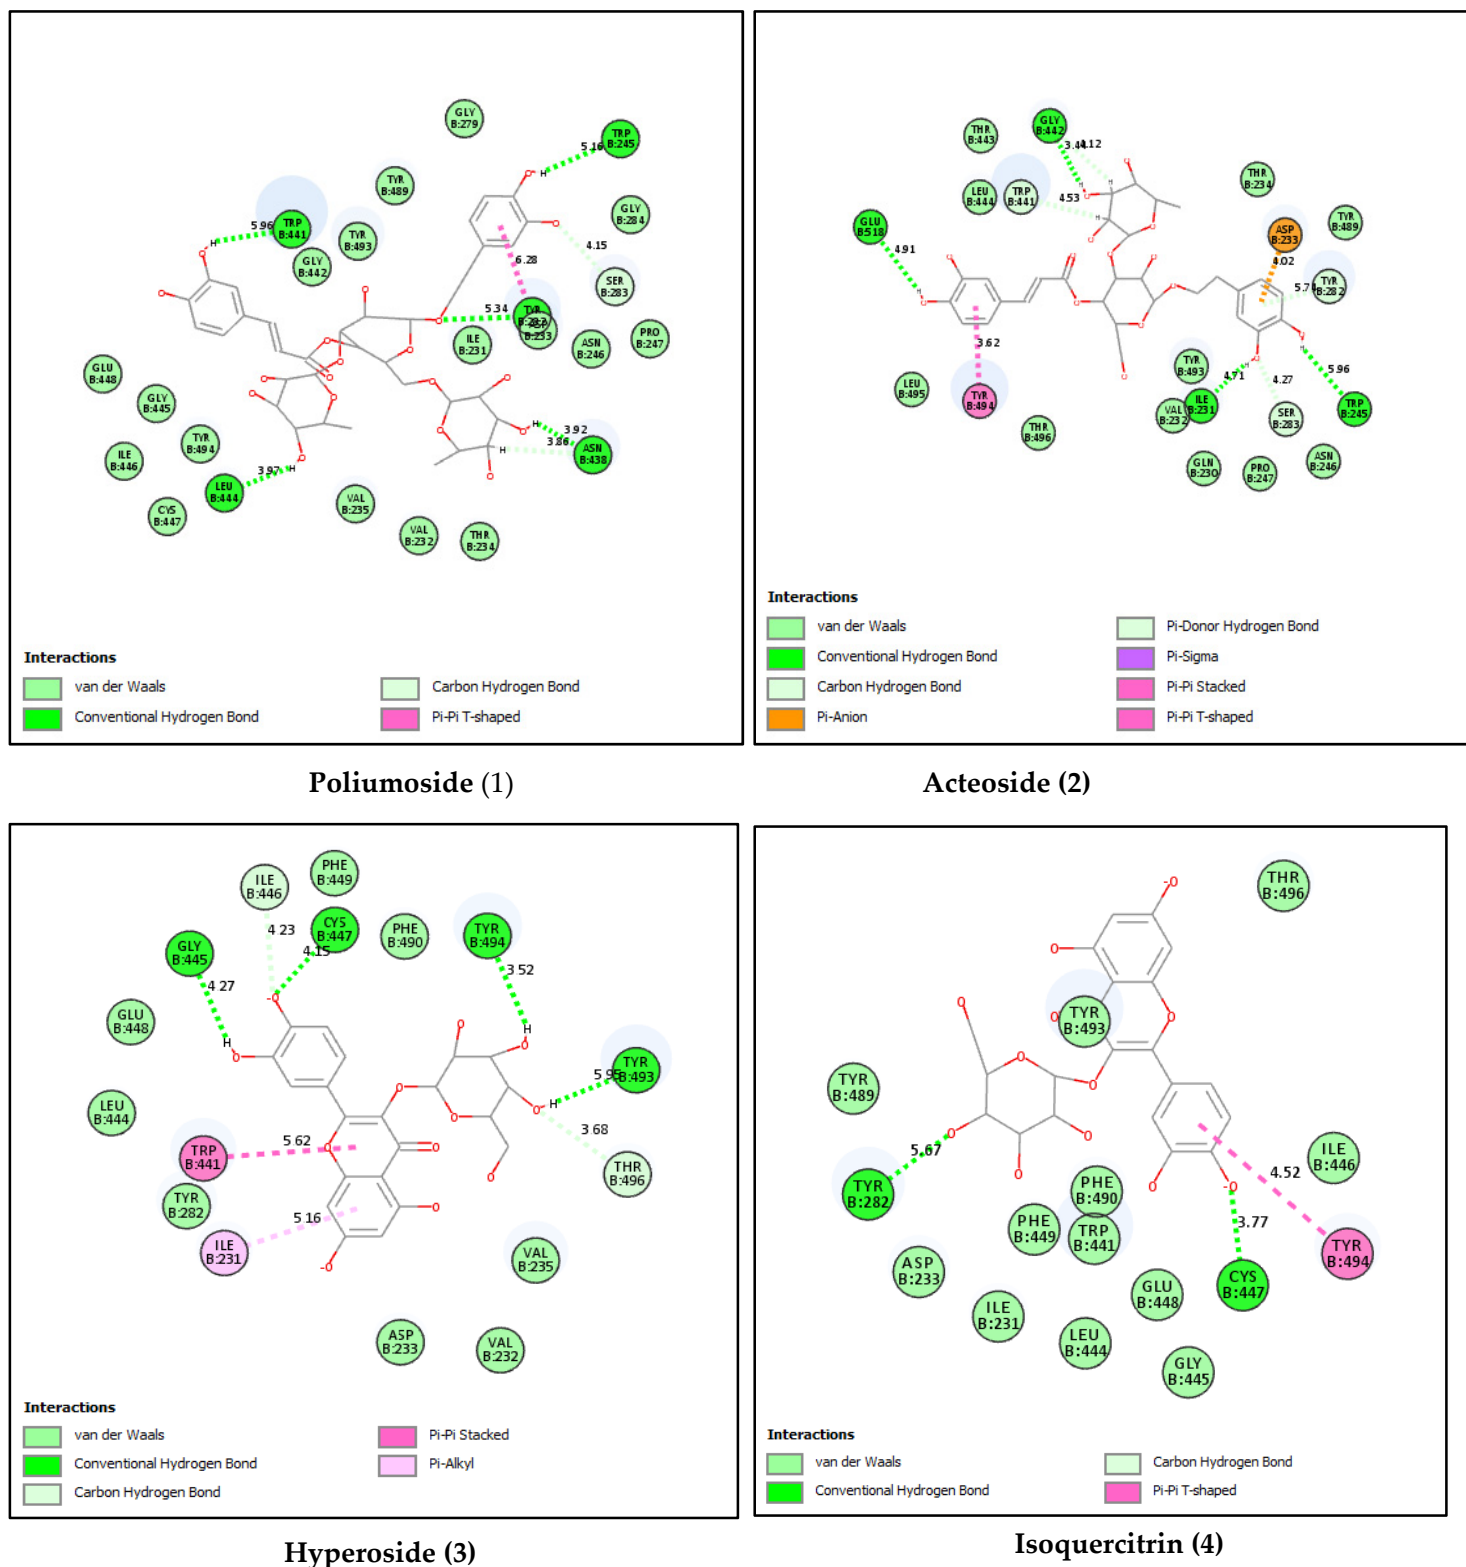

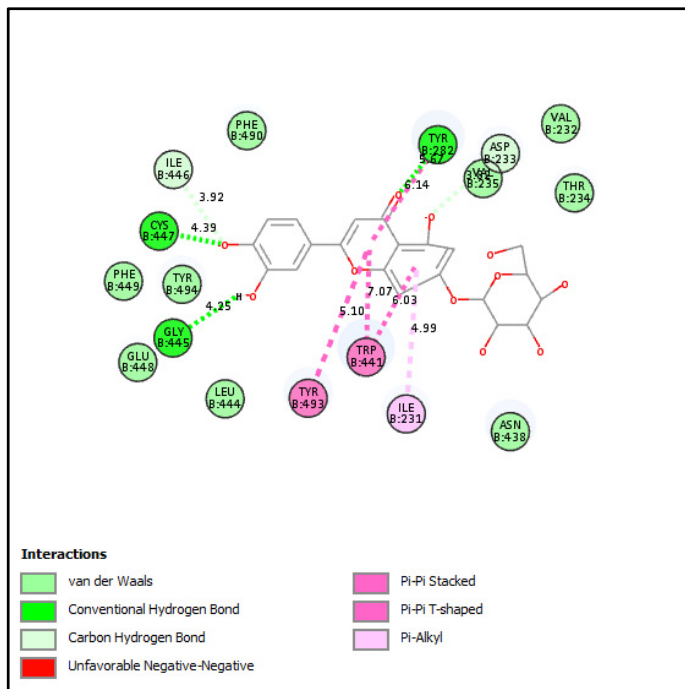

Luteolin 7-O- $\beta$ -D glucopyranoside (5)

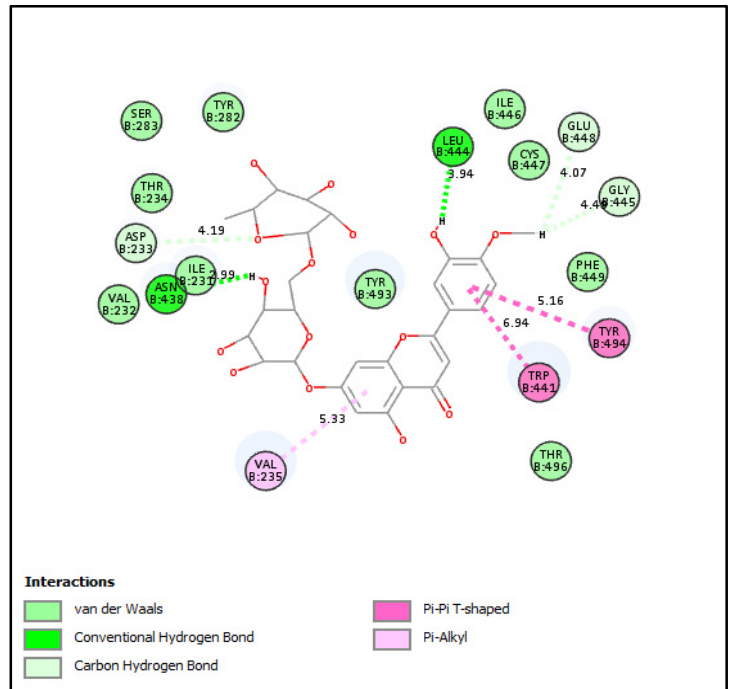

Diosmin (6)

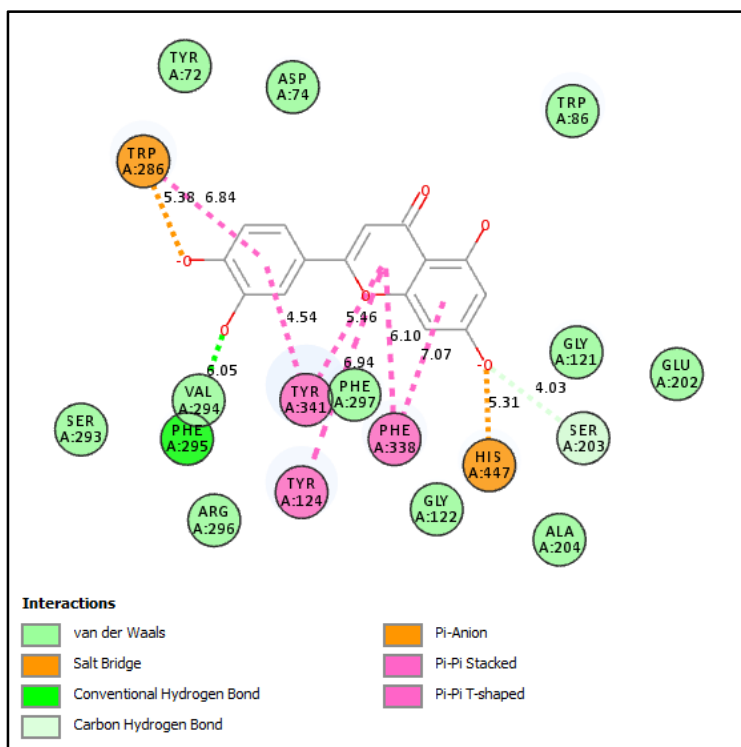

Luteolin (7)

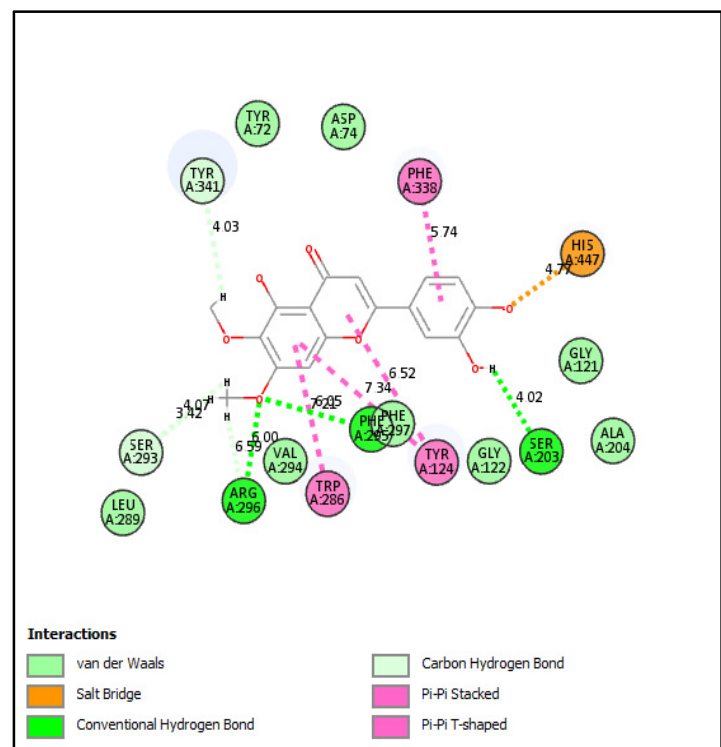

Cirsiolol (8)

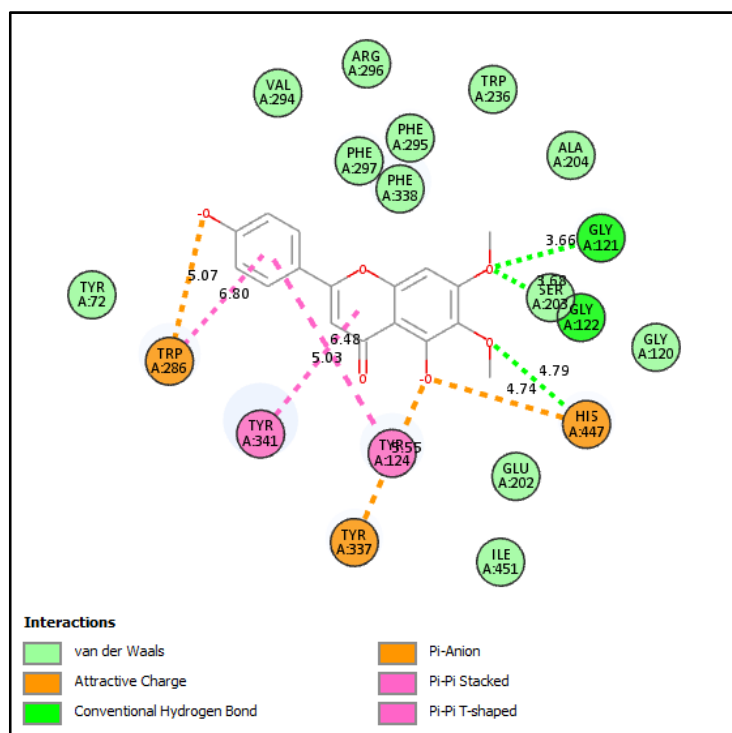

Cirsimaritin (9)

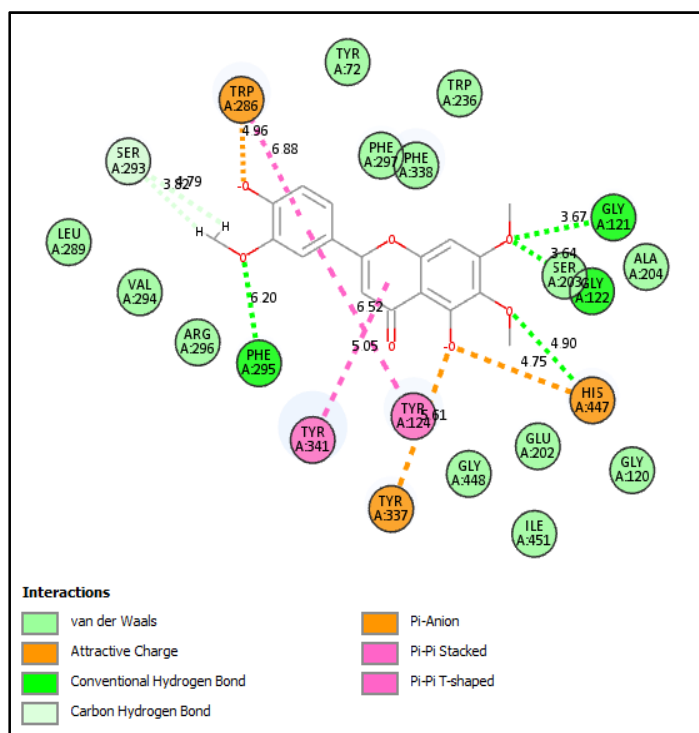

Cirsilineol (10)

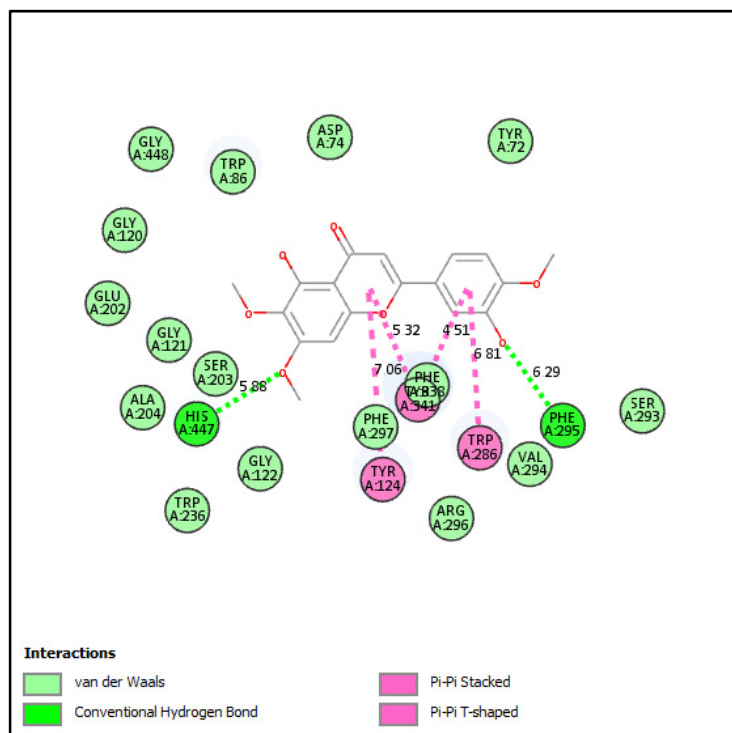

Eupatorin (11)

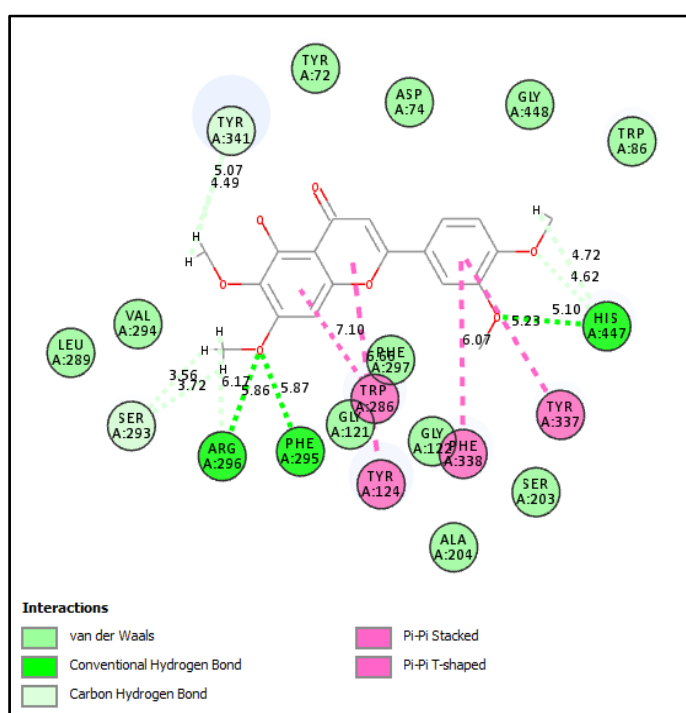

5-Desmethylinensetin (12)

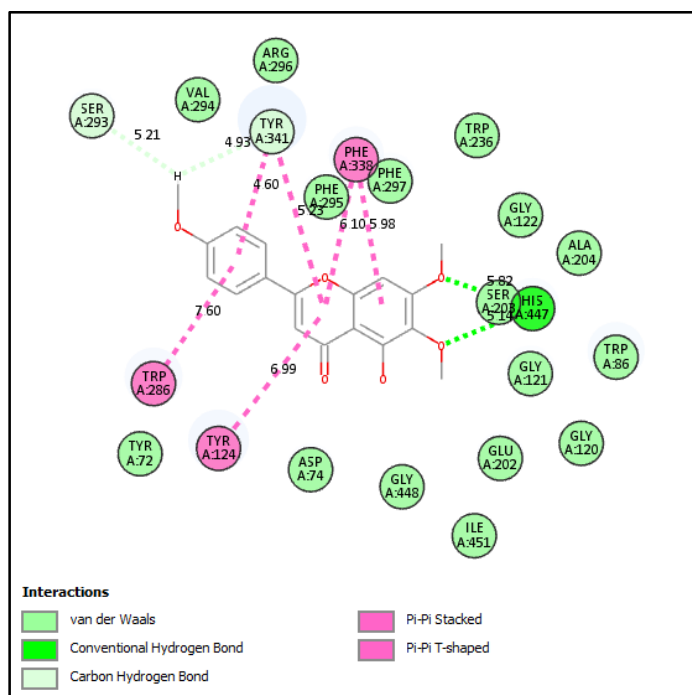

Salvigenin (13)

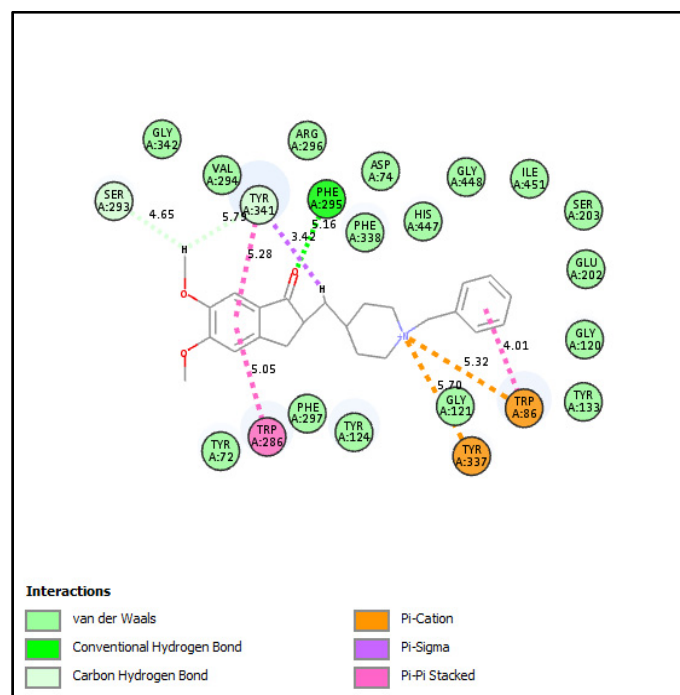

Donepezil
